# Supplementary material for: Social Network Prediction Problems: Using Meta-Paths and Dynamic Heterogeneous Graph Representation for Label Propagation
Source: Atypon-hosted journal article supplement (doi:10.1287/ijoc.2023.0274), 2025-11-10
Supplement: ijoc.2023.0274.sm3.pdf [file ijoc.2023.0274.sm3.pdf]

## Online Supplement A: Subgraph Query between $t_1$ and $t_2$

Algorithm 1 shows the pseudo-code of the sub-graph query between  $t_1$  and  $t_2$ , which is the first portion for all the subsequent queries discussed in this section. In the following queries, the output of the Algorithm 1 will be given as an input. The time complexity of the Algorithm 1 is  $O(n + m)$  where  $n$  is the number of nodes, and  $m$  is the number of edges in original graph.

---

### Algorithm 1 Query Sub-Graph between $t_1$ and $t_2$

---

```

1: Input:  $G(V, E)$ : graph with  $n$  nodes and  $m$  edges
2: Input:  $t_1, t_2$ : timestamp
3: Output:  $G_{t_1-t_2}$ : Subgraph between  $t_1$  and  $t_2$ 
4: define function get_key(val):
5: Initialize key_idx_node, key_idx_edge Lists as empty list()
6: for key, value in networkX.get_attributes(G, 'otype').items() do
7:   if val = value then
8:     key_idx_node.Append(key)
9:     key_idx_edge.Append(key)
10:  end if
11: end for
12: return key_idx_node, key_idx_edge
13: posts, comments, users = get_key(['post', 'comment', 'user'])
14: votes, authoreds, replis = get_key(['vote', 'authored', 'reply'])
15: Initialize subG_vote, subG_reply, subG_authored, user_in, post_in, cm_in Lists as empty list()
16: for vote in votes do
17:   if G.edges()[vote]['time']  $\geq t_1$  and G.edges()[vote]['time']  $\leq t_2$  then
18:     subG_vote.Append(vote)
19:     user_in.Append(vote[0])
20:     if G.nodes()[vote[1]]['otype'] = 'comment' then
21:       cm_in.Append(vote[1])
22:     end if
23:   end if
24: end for
25: for reply in replis do
26:   if G.edges()[reply]['time']  $\geq t_1$  and G.edges()[reply]['time']  $\leq t_2$  then
27:     subG_reply.Append(reply)
28:     if reply[1] not in cm_in then
29:       cm_in.Append(reply[1])
30:     end if
31:   end if
32: end for
33: for authored in authoreds do
34:   if authored[1] in posts or cm_in then
35:     subG_authored.Append(authored)
36:   end if
37: end for
38: G_node = G.subgraph(post + cm_in + user_in)
39: Graph = G.node.edge_subgraph(subG_vote + subG_authored + subG_reply)  $G_{t_1-t_2}$  = networkX.Graph(Graph)
40: return  $G_{t_1-t_2}$ 

```

---

## Online Supplement B: Querying on Category of Posts

Algorithm 2 is the query following the subgraph between  $t_1$  and  $t_2$  query to select posts with a specific category within that time frame. The time complexity of this algorithm is  $O(p+q)$ , where  $p$  is the number of nodes and  $q$  is the number of edges in subgraph between  $t_1$  and  $t_2$ .

---

### Algorithm 2 Query SubGraph between $t_1$ and $t_2$ with an specified category

---

```
1: Input: category: List of category (string)
2: Input:  $G_{t_1,t_2}$ : Subgraph between  $t_1$  and  $t_2$ 
3: Output:  $G_{t_1,t_2,category}$ : Subgraph between  $t_1$  and  $t_2$  with defined posts' categories
4: posts_indices = list(key for key, value in networkX.get_node_attributes( $G_{t_1,t_2}$ , 'otype').items() if value = 'post')
5:  $subG_{t_1,t_2,post}$  = list(idx for idx in posts_indices if  $G_{t_1,t_2}.nodes()[idx]['category']$  in category)
6: Initialize related_node, related_edge, comment_related Lists as empty list()
7: for index in  $subG_{t_1,t_2,post}$  do
8:     /*finding related nodes and edges to posts' categories */
9:     related_node.Append( $subG_{t_1,t_2,post}.in\_edges(index)[0]$ )
10:    related_edge.Append( $subG_{t_1,t_2,post}.in\_edges(index)$ )
11:    comment_related.Append( $subG_{t_1,t_2,post}.out\_edges(index)[1]$ )
12:    /* finding related nodes and edges to the comments of posts' categories */
13:    for cm_idx in comment_related do
14:        related_node.Append( $G_{t_1,t_2}.in\_edges(cm\_inx)[0]$  if not in related_node)
15:        related_edge.Append( $G_{t_1,t_2}.out\_edges(cm\_inx)$  if not in related_edge)
16:    end for
17: end for
18:  $G\_nodes\_category$  =  $G_{t_1,t_2}.subgraph(related\_node + comment\_related +  $subG_{t_1,t_2,post}$ )$ 
19:  $G_{t_1,t_2,category}$  = networkX.Graph( $G\_nodes\_category.edge\_subgraph(related\_edge)$ )
20: return  $G_{t_1,t_2,category}$ 
```

---

### Online Supplement C: Popularity Query

Algorithm 3 is the query on the subgraph between  $t_1$  and  $t_2$  to sort posts based on their vote and comment count. Its time complexity is  $O(p \log(p) + pq)$ , where  $p$  is the number of nodes and  $q$  is the number of edges in subgraph between  $t_1$  and  $t_2$ . If  $O(pq) \gg O(p \log(p))$ , the time complexity is  $O(pq)$ , or vice versa.

---

#### Algorithm 3 Query to Sort posts based on their vote and comment count

---

```

1: Input:  $G_{t_1.t_2}$  : Subgraph between  $t_1$  and  $t_2$ 
2: Output: comments_sorted, votes_sorted: Lists of posts in descending order based on their comment and vote count
3: Initialize vote_count List as empty list()
4: Initialize comment_count List as empty list()
5: for node_index in  $G_{t_1.t_2}$ .nodes() do
6:     vote = 0
7:     comment = 0
8:     if  $G_{t_1.t_2}$ .nodes()[node_index]['otype'] = 'post' then
9:         for [in_edge_index, out_edge_index] in  $G_{t_1.t_2}$ .out_edges(node_index) do
10:            if  $G_{t_1.t_2}$ .edges()[node_index,out_edge_index]['otype'] = 'reply' then
11:                comment += 1
12:            end if
13:        end for
14:        comment_count.Append([node_index, comment])
15:        for [out_edge_index, in_edge_index] in  $G_{t_1.t_2}$ .in_edges(node_index) do
16:            if  $G_{t_1.t_2}$ .edges()[out_edge_index, node_index]['otype'] = 'vote' then
17:                vote += 1
18:            end if
19:        end for
20:        vote_count.Append([node_index, vote])
21:    end if
22: end for
23: comments_sorted = sorted(comment_count, key=lambda x: x[1], reverse = True)
24: votes_sorted = sorted(vote_count, key=lambda x: x[1], reverse = True)
25: return comments_sorted, votes_sorted

```

---

---

## Online Supplement D: Actively Engaged Query

Algorithm 4 is the query on the subgraph between  $t_1$  and  $t_2$  to sort users based on their activities within that time interval. Its time complexity is  $O(U \log U)$ , where  $U$  is the number of users in the input list.

---

### Algorithm 4 Query to Sort users based on Activities

---

```
1: Input: users : List of user node type indices in original graph
2: Input:  $G_{t_1-t_2}$  : Subgraph between  $t_1$  and  $t_2$ 
3: Output: user_activity_sorted: List of users in descending order who are actively engaged
4: Initialize user_activity List as empty list()
5: for user in users do
6:     if user in  $G_{t_1-t_2}$ .nodes() then
7:         user_activity.Append([user, len( $G_{t_1-t_2}$ .out_edges(user))])
8:     end if
9: end for
10: user_activity_sorted = sorted(user_activity, key=lambda x: x[1], reverse = True)
11: return user_activity_sorted
```

---

▷ stores users and count of their activities

## Online Supplement E: Query Performance

The defined queries have a low execution time compared to the size of the graph (some examples illustrated run times on a single machine; here we present query performance results on a compute cluster). Figure 10 illustrates the execution time of each query for a different number of an initial set of posts on 1 node with 128 AMD Epyc 7702 CPU @ 2.0GHz processors and 1 TB memory. We focused on the number of *posts* in each run and implemented four queries for those posts. We considered the same  $t_1$  and  $t_2$  for all the queries. For the second query, we retrieved posts with the "Steemit" category. As demonstrated in Figure 10, the query execution time even for 10K posts is below 6 seconds.

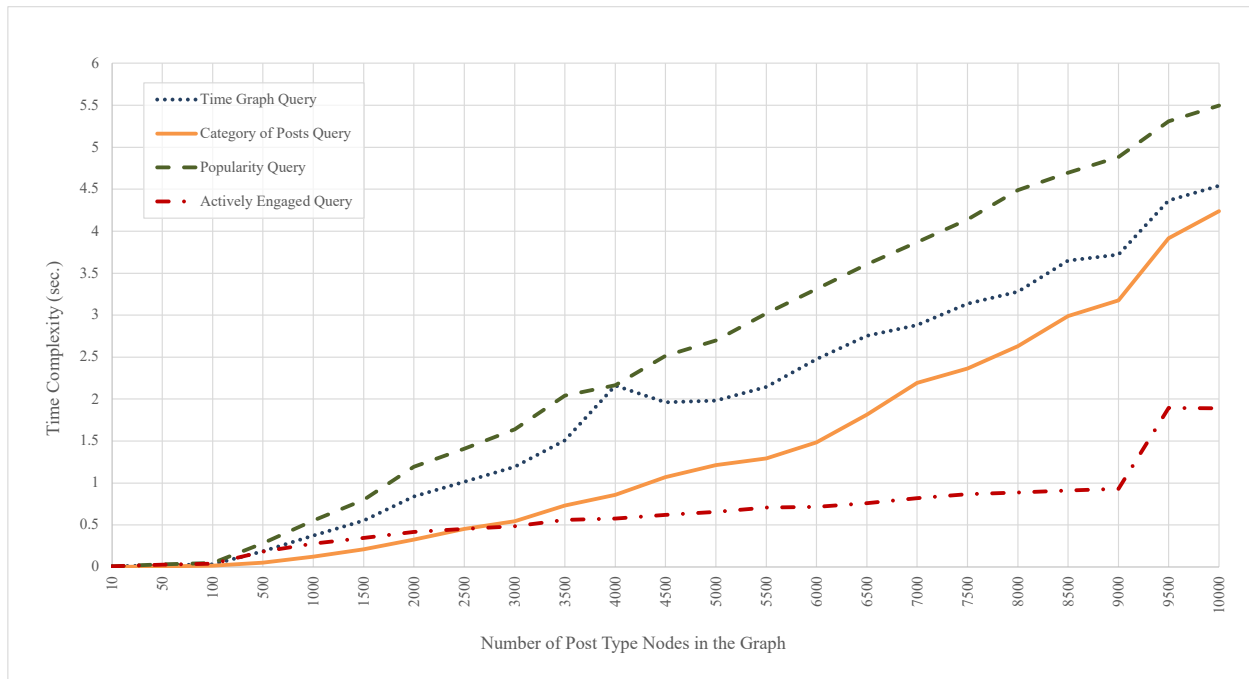

Figure 10 Query time complexity

## Online Supplement F: Meta-paths LP results on Health Steemit Graph

**Table 13 Health Steemit Graph: Various train-test split rates arranged by the time of post creation. The section on "Temporal Homogeneous Graph" lacks meta-paths, while the "Valid Meta-paths" and "Refined Valid Meta-paths" sections are based on proposed temporal meta-paths. "Refined Valid Meta-paths" encompass posts with at least one previous connection**

| Health Category | 70-30 train-test split rate |          |             |               |                     |          |             |               |                          |          |             |               |
|-----------------|-----------------------------|----------|-------------|---------------|---------------------|----------|-------------|---------------|--------------------------|----------|-------------|---------------|
|                 | Temporal Homogeneous Graph  |          |             |               | Valid Meta-paths    |          |             |               | Refined Valid Meta-paths |          |             |               |
|                 | # Labels (test set)         | Baseline | # TP Labels | Accuracy      | # Labels (test set) | Baseline | # TP Labels | Accuracy      | # Labels (test set)      | Baseline | # TP Labels | Accuracy      |
| Cancer          | 398                         | 3.88%    | 20          | 5.03%         | 42                  | 7.32%    | 37          | 88.10%        | 17                       | 2.96%    | 12          | 70.59%        |
| Diet            | 1244                        | 12.13%   | 14          | 1.13%         | 37                  | 6.45%    | 5           | 13.51%        | 13                       | 2.26%    | 5           | 38.46%        |
| Drugs           | 388                         | 3.78%    | 22          | 5.67%         | 25                  | 4.36%    | 3           | 12.00%        | 7                        | 1.22%    | 3           | 42.86%        |
| Health          | 783                         | 7.63%    | 96          | 12.26%        | 50                  | 8.71%    | 0           | 0.00%         | 11                       | 1.92%    | 0           | 0.00%         |
| Healthcare      | 766                         | 7.47%    | 42          | 5.48%         | 99                  | 17.25%   | 10          | 10.10%        | 70                       | 12.20%   | 10          | 14.29%        |
| Healthy         | 2079                        | 20.27%   | 159         | 7.65%         | 60                  | 10.45%   | 5           | 8.33%         | 19                       | 3.31%    | 4           | 21.05%        |
| Medical         | 319                         | 3.11%    | 74          | 23.20%        | 63                  | 10.98%   | 5           | 7.94%         | 21                       | 3.66%    | 5           | 23.81%        |
| Medicine        | 577                         | 5.63%    | 307         | 53.21%        | 32                  | 5.57%    | 2           | 6.25%         | 4                        | 0.70%    | 1           | 25.00%        |
| Meditation      | 2412                        | 23.52%   | 995         | 41.25%        | 76                  | 13.24%   | 9           | 11.84%        | 37                       | 6.45%    | 8           | 21.62%        |
| Yoga            | 1291                        | 12.59%   | 354         | 27.42%        | 90                  | 15.68%   | 45          | 50.00%        | 65                       | 11.32%   | 40          | 61.54%        |
| <b>Total</b>    | <b>10257</b>                | <b>-</b> | <b>2083</b> | <b>20.31%</b> | <b>574</b>          | <b>-</b> | <b>121</b>  | <b>21.08%</b> | <b>264</b>               | <b>-</b> | <b>88</b>   | <b>33.33%</b> |

  

| Health Category | 80-20 train-test split rate |          |             |               |                     |          |             |               |                          |          |             |               |
|-----------------|-----------------------------|----------|-------------|---------------|---------------------|----------|-------------|---------------|--------------------------|----------|-------------|---------------|
|                 | Temporal Homogeneous Graph  |          |             |               | Valid Meta-paths    |          |             |               | Refined Valid Meta-paths |          |             |               |
|                 | # Labels (test set)         | Baseline | # TP Labels | Accuracy      | # Labels (test set) | Baseline | # TP Labels | Accuracy      | # Labels (test set)      | Baseline | # TP Labels | Accuracy      |
| Cancer          | 366                         | 4.52%    | 4           | 1.09%         | 33                  | 8.62%    | 26          | 78.79%        | 16                       | 4.18%    | 9           | 56.25%        |
| Diet            | 879                         | 10.85%   | 65          | 7.39%         | 22                  | 5.74%    | 2           | 9.09%         | 6                        | 1.57%    | 2           | 33.33%        |
| Drugs           | 341                         | 4.21%    | 10          | 2.93%         | 17                  | 4.44%    | 2           | 11.76%        | 5                        | 1.31%    | 2           | 40.00%        |
| Health          | 547                         | 6.75%    | 99          | 18.10%        | 30                  | 7.83%    | 0           | 0.00%         | 7                        | 1.83%    | 0           | 0.00%         |
| Healthcare      | 479                         | 5.91%    | 26          | 5.43%         | 75                  | 19.58%   | 19          | 25.33%        | 57                       | 14.88%   | 19          | 33.33%        |
| Healthy         | 1662                        | 20.52%   | 133         | 8.00%         | 32                  | 8.36%    | 3           | 9.38%         | 9                        | 2.35%    | 3           | 33.33%        |
| Medical         | 145                         | 1.79%    | 46          | 31.72%        | 34                  | 8.88%    | 5           | 14.71%        | 12                       | 3.13%    | 5           | 41.67%        |
| Medicine        | 454                         | 5.60%    | 176         | 38.77%        | 18                  | 4.70%    | 2           | 11.11%        | 4                        | 1.04%    | 1           | 25.00%        |
| Meditation      | 2241                        | 27.67%   | 618         | 27.58%        | 48                  | 12.53%   | 13          | 27.08%        | 33                       | 8.62%    | 11          | 33.33%        |
| Yoga            | 986                         | 12.17%   | 315         | 31.95%        | 74                  | 19.32%   | 31          | 41.89%        | 57                       | 14.88%   | 29          | 50.88%        |
| <b>Total</b>    | <b>8100</b>                 | <b>-</b> | <b>1492</b> | <b>18.42%</b> | <b>383</b>          | <b>-</b> | <b>103</b>  | <b>26.89%</b> | <b>206</b>               | <b>-</b> | <b>81</b>   | <b>39.32%</b> |

  

| Health Category | 90-10 train-test split rate |          |             |               |                     |          |             |               |                          |          |             |               |
|-----------------|-----------------------------|----------|-------------|---------------|---------------------|----------|-------------|---------------|--------------------------|----------|-------------|---------------|
|                 | Temporal Homogeneous Graph  |          |             |               | Valid Meta-paths    |          |             |               | Refined Valid Meta-paths |          |             |               |
|                 | # Labels (test set)         | Baseline | # TP Labels | Accuracy      | # Labels (test set) | Baseline | # TP Labels | Accuracy      | # Labels (test set)      | Baseline | # TP Labels | Accuracy      |
| Cancer          | 294                         | 6.20%    | 5           | 1.70%         | 17                  | 8.90%    | 15          | 88.24%        | 10                       | 5.24%    | 8           | 80.00%        |
| Diet            | 816                         | 17.20%   | 13          | 1.59%         | 11                  | 5.76%    | 2           | 18.18%        | 4                        | 2.09%    | 2           | 50.00%        |
| Drugs           | 255                         | 5.38%    | 4           | 1.57%         | 9                   | 4.71%    | 0           | 0.00%         | 1                        | 0.52%    | 0           | 0.00%         |
| Health          | 371                         | 7.82%    | 41          | 11.05%        | 16                  | 8.38%    | 0           | 0.00%         | 5                        | 2.62%    | 0           | 0.00%         |
| Healthcare      | 279                         | 5.88%    | 111         | 39.78%        | 39                  | 20.42%   | 19          | 48.72%        | 32                       | 16.75%   | 19          | 59.38%        |
| Healthy         | 204                         | 4.30%    | 57          | 27.94%        | 17                  | 8.90%    | 1           | 5.88%         | 4                        | 2.09%    | 1           | 25.00%        |
| Medical         | 94                          | 1.98%    | 20          | 21.28%        | 20                  | 10.47%   | 3           | 15.00%        | 7                        | 3.66%    | 3           | 42.86%        |
| Medicine        | 240                         | 5.06%    | 23          | 9.58%         | 11                  | 5.76%    | 1           | 9.09%         | 2                        | 1.05%    | 1           | 50.00%        |
| Meditation      | 1860                        | 39.21%   | 363         | 19.52%        | 21                  | 10.99%   | 1           | 4.76%         | 9                        | 4.71%    | 1           | 11.11%        |
| Yoga            | 331                         | 6.98%    | 233         | 70.39%        | 30                  | 15.71%   | 17          | 56.67%        | 22                       | 11.52%   | 15          | 68.18%        |
| <b>Total</b>    | <b>4744</b>                 | <b>-</b> | <b>870</b>  | <b>18.34%</b> | <b>191</b>          | <b>-</b> | <b>59</b>   | <b>30.89%</b> | <b>96</b>                | <b>-</b> | <b>50</b>   | <b>52.08%</b> |
